# Supplementary material for: The Impact on Dietary Outcomes of Celebrities and Influencers in Marketing Unhealthy Foods to Children: A Systematic Review and Meta-Analysis
Source: MDPI journal article supplement (doi:10.3390/nu14030434), 2022-01-19

## Supplemental file

**Table S1: Details of search**

### Databases

- Medline (OVID)
- Cochrane Library
- Scopus
- PsycInfo (OVID)
- ProQuest (Central)- ASSIA
- Web of Science- Social sciences and emerging sources citation indexes
- Social Policy and Practice (OVID)

### Inclusion criteria/search terms

| Participants                       | 0-15 years                                                                                                                                                                                                                                                                                                                                                    | child* OR youth* OR adolescen* OR young people OR young person* OR schoolchild* OR boy* OR girl* OR teen* OR school child* NOT adult*                                                                                                                                  |
|------------------------------------|---------------------------------------------------------------------------------------------------------------------------------------------------------------------------------------------------------------------------------------------------------------------------------------------------------------------------------------------------------------|------------------------------------------------------------------------------------------------------------------------------------------------------------------------------------------------------------------------------------------------------------------------|
| Exposure (intervention)            | Exposure to advertising of HFSS/unhealthy food advertisement                                                                                                                                                                                                                                                                                                  | advert* OR market* OR commercial* OR promot* OR Instagram* OR youtube* OR facebook* OR pack * OR label*, OR sticker* OR bag* OR box* OR tin* OR jar* OR carton* OR sleeve*, OR advergam* OR tag* OR lid* OR container*                                                 |
| Exposure (celebrities/influencers) | Exposure to advertising of HFSS/unhealthy food advertisement using celebrities/influencers                                                                                                                                                                                                                                                                    | celebrit* OR celebrity endors* OR endors* OR influenc* OR social media influenc* OR social influenc*                                                                                                                                                                   |
| Exposure (food)                    | Intervention vs. no intervention<br>Comparison of HFSS food advertisement with celebrities/influencer and non-food advertisement control OR<br>HFSS food advertisement with celebrity/influencer compared to HFSS food advertisement without celebrity/influencer<br>Could also include a healthy food comparison group with OR without celebrity/influencer. | food* OR beverage* OR soda* OR cola* OR fizzy adj drink* OR carbonated adj beverage* OR carbonated adj drink* OR soft adj beverage* OR soft adj drink* OR high salt* OR high fat* OR high sugar* OR snack* OR sweet* OR meal* OR HFSS OR snack* OR sweet* NOT alcohol* |
| Outcome measure                    | Any of these:<br>Energy intake<br>Ad libitum consumption of food<br>Dietary behaviour<br>Preference of food<br>Purchase intention                                                                                                                                                                                                                             | intake* OR consumption* OR choice OR eating behavio* OR dietary intake OR body mass index OR BMI OR body composition OR adipos* OR body fat OR obes* OR overweight OR energy consumption OR energy intake OR judgement* OR preference* OR liking OR favor* OR attitude |
| Study designs                      | Experimental; intervention (with or without a control group)                                                                                                                                                                                                                                                                                                  |                                                                                                                                                                                                                                                                        |
| Other                              |                                                                                                                                                                                                                                                                                                                                                               |                                                                                                                                                                                                                                                                        |

|           |           |
|-----------|-----------|
| Geography | All       |
| Languages | All       |
| Time      | 2009-2021 |

**Table S2: Search history**

---

Medline (OVID)

1 exp adolescent/ or exp child/ or exp infant/

2 (child\* or youth\* or adolescen\* young people or Young person\* or boy\* or girl\* or teen\* or Infant\* or preschool\* or toddler\* or minor\* or Babies or Baby).ti,ab,id.

3 1 or 2

4 Marketing/ or Advertising as topic/ or Product packaging/ or Food packaging/ or Food labelling/ or Advertisement/ or Social marketing/ or social media/

5 ((advert\* adj2 food) or (advert\* adj2 supermarket) or (advert\* adj2 buy\*) or (market\* adj2 food) or (market\* adj2 supermarket) or (market\* adj2 buy\*) or (promot\* adj2 food) or (promot\* adj2 supermarket) or (promot\* adj2 buy\*) or (promot\* adj2 food) or (promot\* adj2 supermarket) or (promot\* adj2 buy\*) or commercials or "TV commercial\*" or "Television commercial\*" or "radio commercial\*" or "media commercial\*" or digital adver\* or digital market\* or Mobile app\* or Mobile application\* or advergam\* or Facebook or Instagram or Twitter or Snapchat or Youtube or Weibo or Wechat or Youku).ti,ab,id.

6 4 or 5

7 Food/ or Beverages/ or Carbonated beverages/

8 (food\* or beverage\* or Cola or Colas or Soda or sodas or (fizzy adj2 drink\*) or (carbonated adj2 drink\*) or (soft adj drink\*) or high salt\* or high fat\* or high sugar\* or snack\* or sweet\* or Meal\* or HFSS).ti,ab,id.

9 7 or 8

10 exp Famous Persons/ or exp Athletes/

11 (celebrit\* or endors\* or influencer\* or ((professional or elit\* or famous or public or renown\* or well-known or acclaim\* or eminent or prominent or illustrious or recogniz\* or reput\* or influential or wealth\* or power\*) adj1 (person\* or people or figure\* or leader or athlete\* or player or bodybuilder or sport\* or basketball or football or hockey or baseball or soccer or Olympian or singer\* or songwriter\* or musician\* or band or group or rapper\* or artist\* or actor\* or actress or star or Hollywood or Bollywood or Nollywood or dancer or writer or author or comedian or performer or model\* or supermodel\* or chef or philanthropist or politic\* or president or minister or king or queen or prince\* or monarch))) .ti,ab,id.

12 10 or 11

13 Eating/ or Snacks/ or Drinking/ or Food Preferences/ or Feeding Behavior/ or Diet, High-Fat/ or Diet/ or Diet, Western/ or energy intake/

14 (intake\* or calori\* or consumption\* or food choice\* or eating behavio\* or snacking behavio\* or preference\* or favour\* or favor\* or purchas\* or buy\* or spend\* or pester\* or request\* or liking).ti,ab,id.

15 13 or 14

16 3 and 6 and 9 and 12 and 15

17 16

18 limit 17 to yr="2009 -Current"

---

Social Policy and Practice

1 (child\* or youth\* or adolescen\* young people or Young person\* or boy\* or girl\* or teen\* or Infant\* or preschool\* or toddler\* or minor\* or Babies or Baby).ab,de,hw,nt,ti.

2 (advert\* or (market\* adj2 food) or (market\* adj2 supermarket) or (market\* adj2 buy\*) or (promot\* adj2 food) or (promot\* adj2 supermarket) or (promot\* adj2 buy\*) or (promot\* adj2 food) or (promot\* adj2 supermarket) or (promot\* adj2 buy\*) or commercials or "TV commercial\*" or "Television commercial\*" or "radio commercial\*" or "media commercial\*" or digital adver\* or digital market\* or Mobile app\* or Mobile application\* or advergam\* or Facebook or Instagram or Twitter or Snapchat or Youtube or Weibo or Wechat or Youku).ab,de,hw,nt,ti.

3 (food\* or beverage\* or Cola or Colas or Soda or sodas or (fizzy adj2 drink\*) or (carbonated adj2 drink\*) or (soft adj drink\*) or high salt\* or high fat\* or high sugar\* or snack\* or sweet\* or Meal\* or HFSS).ab,de,hw,nt,ti.

4 (celebrit\* or endors\* or influencer\* or ((professional or elit\* or famous or public or renown\* or well-known or acclaim\* or eminent or prominent or illustrious or recogniz\* or reput\* or influential or wealth\* or power\*) adj1 (person\* or people or figure\* or leader or athlete\* or player or bodybuilder or sport\* or basketball or football or hockey or baseball or soccer or Olympian or singer\* or songwriter\* or musician\* or band or group or rapper\* or artist\* or actor\* or actress or star or Hollywood or Bollywood or Nollywood or dancer or writer or author or comedian or performer or model\* or supermodel\* or chef or philanthropist or politic\* or president or minister or king or queen or prince\* or monarch))) .ab,de,hw,nt,ti.

---

---

5 (intake\* or calori\* or consumption\* or food choice\* or eating behavio\* or snacking behavio\* or preference\* or favour\* or favor\* or purchas\* or buy\* or spend\* or pester\* or request\* or liking).ab,de,hw,nt,ti.

6 1 and 2 and 3 and 4 and 5

---

Web of Science

#1 TS= (child\* OR youth\* OR adolescen\* young people OR Young person\* OR boy\* OR girl\* OR teen\* OR Infant\* OR preschool\* OR toddler\* OR minor\* OR Babies OR Baby) Indexes=SSCI, ESCI

#2 TS=(advert\* or (market\* adj2 food) or (market\* adj2 supermarket) or (market\* adj2 buy\*) or (promot\* adj2 food) or (promot\* adj2 supermarket) or (promot\* adj2 buy\*) or (promot\* adj2 food) or (promot\* adj2 supermarket) or (promot\* adj2 buy\*) or commercials or "TV commercial\*" or "Television commercial\*" or "radio commercial\*" or "media commercial\*" or digital adver\* or digital market\* or Mobile app\* or Mobile application\* or advergam\* or Facebook or Instagram or Twitter or Snapchat or Youtube or Weibo or Wechat or Youku)

Indexes=SSCI, ESCI

#3 TS= (food\* or beverage\* or Cola or Colas or Soda or sodas or (fizzy adj2 drink\*) or (carbonated adj2 drink\*) or (soft adj drink\*) or high salt\* or high fat\* or high sugar\* or snack\* or sweet\* or Meal\* or HFSS) Indexes=SSCI, ESCI

#4 TS=(celebrit\* or endors\* or influencer\* or ((professional or elit\* or famous or public or renown\* or well-known or acclaim\* or eminent or prominent or illustrious or recogniz\* or reput\* or influential or wealth\* or power\*) adj1 (person\* or people or figure\* or leader or athlete\* or player or bodybuilder or sport\* or basketball or football or hockey or baseball or soccer or Olympian or singer\* or songwriter\* or musician\* or band or group or rapper\* or artist\* or actor\* or actress or star or Hollywood or Bollywood or Nollywood or dancer or writer or author or comedian or performer or model\* or supermodel\* or chef or philanthropist or politic\* or president or minister or king or queen or prince\* or monarch) Indexes=SSCI, ESCI

#5 TS= (intake\* or calori\* or consumption\* or food choice\* or eating behavio\* or snacking behavio\* or preference\* or favour\* or favor\* or purchas\* or buy\* or spend\* or pester\* or request\* or liking) Indexes=SSCI, ESCI

#6 (((#5) AND #4) AND #3) AND #2) AND #1 Indexes=SSCI, ESCI

---

SCOPUS

1 TITLE-ABS-KEY ( child\* OR youth\* OR adolescen\* OR "young people" OR "young person\*" OR boy\* OR girl\* OR teen\* OR infant\* OR preschool\* OR toddler\* OR minor\* OR babies OR baby )

2 TITLE-ABS-KEY ( advert\* OR ( market\* W/2 food ) OR ( market\* W/2 supermarket ) OR ( market\* W/2 buy\* ) OR ( promot\* W/2 food ) OR ( promot\* W/2 supermarket ) OR ( promot\* W/2 buy\* ) OR commercials OR "TV commercial\*" OR "Television commercial\*" OR "radio commercial\*" OR "media commercial\*" OR ( digital W/2 adver\* ) OR ( digital W/2 market\* ) OR ( mobile W/2 app\* ) OR ( mobile W/2 application\* ) OR advergam OR facebook OR instagram OR twitter OR snapchat OR youtube OR weibo OR wechat OR youku )

3 TITLE-ABS-KEY ( food\* OR beverage\* OR cola OR colas OR soda OR sodas OR ( fizzy W/2 drink\* ) OR ( carbonated W/2 drink\* ) OR ( soft W/2 drink\* ) OR "high salt\*" OR "high fat\*" OR "high sugar\*" OR snack\* OR sweet\* OR meal\* OR hfss )

4 TITLE-ABS-KEY (celebrit\* or endors\* or influencer\* or ((professional or elit\* or famous or public or renown\* or well-known or acclaim\* or eminent or prominent or illustrious or recogniz\* or reput\* or influential or wealth\* or power\*) W/1 (person\* or people or figure\* or leader or athlete\* or player or bodybuilder or sport\* or basketball or football or hockey or baseball or soccer or Olympian or singer\* or songwriter\* or musician\* or band or group or rapper\* or artist\* or actor\* or actress or star or Hollywood or Bollywood or Nollywood or dancer or writer or author or comedian or performer or model\* or supermodel\* or chef or philanthropist or politic\* or president or minister or king or queen or prince\* or monarch)))

5 TITLE-ABS-KEY ( intake\* OR calori\* OR consumption\* OR "food choice\*" OR "eating behavio\*" OR "snacking behavio\*" OR preference\* OR liking OR favor\* OR favour\* OR purchas\* OR buy\* OR spend\* OR request\* OR pester\* )

6 ( TITLE-ABS-KEY ( ( child\* OR youth\* OR adolescen\* OR "young people" OR "young person\*" OR boy\* OR girl\* OR teen\* OR infant\* OR preschool\* OR toddler\* OR minor\* OR babies OR baby ) ) ) AND ( TITLE-ABS-KEY ( ( advert\* OR ( market\* W/2 food ) OR ( market\* W/2 supermarket ) OR ( market\* W/2 buy\* ) OR ( promot\* W/2 food ) OR ( promot\* W/2 supermarket ) OR ( promot\* W/2 buy\* ) OR commercials OR "TV commercial\*" OR "Television commercial\*" OR "radio commercial\*" OR "media commercial\*" OR ( digital W/2 adver\* ) OR ( digital W/2 market\* ) OR ( mobile W/2 app\* ) OR ( mobile W/2 application\* OR advergam OR facebook OR instagram OR twitter OR snapchat OR youtube OR weibo OR wechat OR youku ) ) ) AND ( TITLE-ABS-KEY ( ( food\* OR beverage\* OR cola OR colas OR soda OR sodas OR ( fizzy W/2 drink\* ) OR ( carbonated W/2 drink\* ) OR ( soft W/2 drink\* ) OR "high salt\*" OR "high fat\*" OR "high sugar\*" OR snack\* OR sweet\* OR meal\* OR hfss ) ) ) AND ( TITLE-ABS-KEY ( ( intake\* OR calori\* OR consumption\* OR "food choice\*" OR "eating behavio\*" OR "snacking behavio\*" OR preference\* OR liking OR favor\* OR favour\* OR purchas\* OR buy\* OR spend\* OR request\* OR pester\* ) ) ) AND ( TITLE-ABS-KEY ((celebrit\* or endors\* or influencer\* or ((professional or elit\* or

---

---

famous or public or renown\* or well-known or acclaim\* or eminent or prominent or illustrious or recogniz\* or reput\* or influential or wealth\* or power\*) W/1 (person\* or people or figure\* or leader or athlete\* or player or bodybuilder or sport\* or basketball or football or hockey or baseball or soccer or Olympian or singer\* or songwriter\* or musician\* or band or group or rapper\* or artist\* or actor\* or actress or star or Hollywood or Bollywood or Nollywood or dancer or writer or author or comedian or performer or model\* or supermodel\* or chef or philanthropist or politic\* or president or minister or king or queen or prince\* or monarch)))

---

PsycInfo

1 ("100" or "120" or "140" or "160" or "180" or "200").ag.

2 (child\* OR youth\* OR adolescen\* young people OR Young person\* OR boy\* OR girl\* OR teen\* OR Infant\* OR preschool\* OR toddler\* OR minor\* OR Babies OR Baby).ti,ab,id.

3 1 or 2

4 exp Marketing/ or exp Advertising/ or exp digital marketing/ or exp social marketing/ or exp television advertising/ or commercials/ or exp media exposure/ or exp social media/

5 ((advert\* or (market\* adj2 food) or (market\* adj2 supermarket) or (market\* adj2 buy\*) or (promot\* adj2 food) or (promot\* adj2 supermarket) or (promot\* adj2 buy\*) or commercials or "TV commercial\*" or "Television commercial\*" or "radio commercial\*" or "media commercial\*" or digital adver\* or digital market\* or mobile app\* or mobile application\* or advergam\* or facebook or instagram or twitter or snapchat or youtube or weibo or yechat or youku).ti,ab,id.

6 4 or 5

7 Food/ or Fast food/ or exp "Beverages (Nonalcoholic)"/

8 (food\* or beverage\* or cola or colas or soda or sodas or (fizzy adj2 drink\*) or (carbonated adj2 drink\*) or (soft adj drink\*) or high salt\* or high fat\* or high sugar\* or snack or sweet\* or meal or HFSS).ti,ab,id.

9 7 or 8

10 exp food intake/ or exp food preferences/ or exp "Rumination (Eating)"/ or exp eating behavior/ or exp consumer behavior/ or exp brand preferences/

11 (intake\* or calori\* or consumption\* or food choice\* or eating behavio\* or snacking behavio\* or preference\* or "food preferences" or favour\* or favor\* or purchas\* or "food purchas\*" or buy\* or spend\* or pester\* or request\* or liking).ti,ab,id.

12 10 or 11

13 exp Famous Persons/ or exp Athletes/

14 (celebrit\* or endors\* or influencer\* or ((professional or elit\* or famous or public or renown\* or well-known or acclaim\* or eminent or prominent or illustrious or recogniz\* or reput\* or influential or wealth\* or power\*) adj1 (person\* or people or figure\* or leader or athlete\* or player or bodybuilder or sport\* or basketball or football or hockey or baseball or soccer or Olympian or singer\* or songwriter\* or musician\* or band or group or rapper\* or artist\* or actor\* or actress or star or Hollywood or Bollywood or Nollywood or dancer or writer or author or comedian or performer or model\* or supermodel\* or chef or philanthropist or politic\* or president or minister or king or queen or prince\* or monarch))).ti,ab,id.

15 13 or 14

16 3 and 6 and 9 and 12 and 15

17 limit 16 to yr="2019 -Current"

---

Cochrane

ID Search

#1 MeSH descriptor: [Child] explode all trees

#2 MeSH descriptor: [Infant] explode all trees

#3 MeSH descriptor: [Adolescent] explode all trees

#4 (child\* or youth\* or adolescen\* or "young people" or "young person\*" or boy\* or girl\* or teen\* or infant\* or preschool\* or toddler\* or minor\* or babies or baby).ti,ab,id.

#5 MeSH descriptor: [Marketing] explode all trees

#6 MeSH descriptor: [Advertising as Topic] explode all trees

#7 MeSH descriptor: [Product Packaging] explode all trees

#8 MeSH descriptor: [Food Packaging] explode all trees

#9 MeSH descriptor: [Food Labeling] explode all trees

#10 MeSH descriptor: [Advertisement] explode all trees

#11 MeSH descriptor: [Social Marketing] explode all trees

---

---

#12 (advert\* or (market\* adj2 food) or (market\* adj2 supermarket) or (market\* adj2 buy\*) or (promot\* adj2 food) or (promot\* adj2 supermarket) or (promot\* adj2 buy\*) or commercials or "TV commercial\*" or "Television commercial\*" or "radio commercial\*" or "media commercial\*" or digital adver\* or digital market\* or mobile app\* or mobile application\* or advergam\* or facebook or instagram or twitter or snapchat or youtube or weibo or yechat or youku).ti,ab,id.

#13 MeSH descriptor: [Food] explode all trees

#14 MeSH descriptor: [Beverages] explode all trees

#15 MeSH descriptor: [Carbonated Beverages] explode all trees

#16 (food\* or beverage\* or cola or colas or soda or sodas or (fizzy adj2 drink\*) or (carbonated adj2 drink\*) or (soft adj drink\*) or high salt\* or high fat\* or high sugar\* or snack or sweet\* or meal or HFSS).ti,ab,id.

#17 MeSH descriptor: [Famous Persons] explode all trees

#18 (((celebrit\* or endors\* or influencer\* or ((professional or elit\* or famous or public or renown\* or well-known or acclaim\* or eminent or prominent or illustrious or recogniz\* or reput\* or influential or wealth\* or power\*) adj1 (person\* or people or figure\* or leader or athlete\* or player or bodybuilder or sport\* or basketball or football or hockey or baseball or soccer or Olympian or singer\* or songwriter\* or musician\* or band or group or rapper\* or artist\* or actor\* or actress or star or Hollywood or Bollywood or Nollywood or dancer or writer or author or comedian or performer or model\* or supermodel\* or chef or philanthropist or politic\* or president or minister or king or queen or prince\* or monarch)))))).ti,ab,id.

#19 MeSH descriptor: [Eating] explode all trees

#20 MeSH descriptor: [Feeding Behavior] explode all trees

#21 MeSH descriptor: [Snacks] explode all trees

#22 MeSH descriptor: [Drinking] explode all trees

#23 MeSH descriptor: [Food Preferences] explode all trees

#24 MeSH descriptor: [Diet] explode all trees

#25 MeSH descriptor: [Diet, High-Fat] explode all trees

#26 MeSH descriptor: [Diet, Western] explode all trees

#27 MeSH descriptor: [Energy Intake] explode all trees

#28 (intake\* or calor\* or consumption\* or food choice\* or eating behavio\* or snacking behavio\* or preference\* or favour\* or favor\* or purchas\* or buy\* or spend\* or pester\* or request\* or liking).ti,ab,id

#29 #1 OR #2 OR #3 OR #4

#30 #5 OR #6 OR #7 OR #8 OR #9 OR #10 OR #11 OR #12

#31 #13 OR #14 OR #15 OR #16

#32 #17 OR #18

#33 #19 OR #20 OR #21 OR #22 OR #23 OR #24 OR #25 OR #26 OR #27 OR #28

#34 #29 AND #30 AND #31 AND #32 AND #33 with Cochrane Library publication date Between Jan 2009 and Dec 2019, in Cochrane Reviews, Cochrane Protocols, Trials, Clinical Answers, Editorials, Special collections

---

Proquest ASSIA

1 MAINSUBJECT.EXACT.EXPLODE("child") OR MAINSUBJECT.EXACT.EXPLODE("adolescent") OR

MAINSUBJECT.EXACT.EXPLODE("infant")

2 TI,AB(child\* OR youth\* OR adolescen\* young people OR Young person\* OR boy\* OR girl\* OR teen\* OR Infant\* OR preschool\* OR toddler\* OR minor\* OR Babies OR Baby)

3 1 OR 2

4 MAINSUBJECT.EXACT.EXPLODE("Advertising") OR MAINSUBJECT.EXACT.EXPLODE("Advertisements") OR

MAINSUBJECT.EXACT.EXPLODE("Marketing") OR MAINSUBJECT.EXACT.EXPLODE("Packaging")

5 TI,AB(advert\* or (market\* adj2 food) or (market\* adj2 supermarket) or (market\* adj2 buy\*) or (promot\* adj2 food) or (promot\* adj2 supermarket) or (promot\* adj2 buy\*) or (promot\* adj2 food) or (promot\* adj2 supermarket) or (promot\* adj2 buy\*) or commercials or "TV commercial\*" or "Television commercial\*" or "radio commercial\*" or "media commercial\*" or digital adver\* or digital market\* or Mobile app\* or Mobile application\* or advergam\* or Facebook or Instagram or Twitter or Snapchat or Youtube or Weibo or Wechat or Youku)

6 4 OR 5

7 MAINSUBJECT.EXACT("Drinks") OR MAINSUBJECT.EXACT.EXPLODE("Food")

8 TI,AB(food\* or beverage\* or Cola or Colas or Soda or sodas or (fizzy adj2 drink\*) or (carbonated adj2 drink\*) or (soft adj drink\*) or high salt\* or high fat\* or high sugar\* or snack\* or sweet\* or Meal\* or HFSS)

9 7 OR 8

---

---

10 MAINSUBJECT.EXACT("Eating behaviour") OR MAINSUBJECT.EXACT "Food consumption")

11 TI,AB(intake\* or kalori\* or consumption\* or food choice\* or eating behavio\* or snacking behavio\* or preference\* or favour\* or favor\* or purchas\* or buy\* or spend\* or pester\* or request\* or liking)

12 10 OR 11

13 TI,AB(celebrit\* or endors\* or influencer\* or ((professional or elit\* or famous or public or renown\* or well-known or acclaim\* or eminent or prominent or illustrious or recogniz\* or reput\* or influential or wealth\* or power\*) adj1 (person\* or people or figure\* or leader or athlete\* or player or bodybuilder or sport\* or basketball or football or hockey or baseball or soccer or Olympian or singer\* or songwriter\* or musician\* or band or group or rapper\* or artist\* or actor\* or actress or star or Hollywood or Bollywood or Nollywood or dancer or writer or author or comedian or performer or model\* or supermodel\* or chef or philanthropist or politic\* or president or minister or king or queen or prince\* or monarch)))

14 3 and 6 and 9 and 12 and 13

---

**Table S3: Rationale for meta-analysis inclusion and data processing**

---

**Boyland 2013**

Intervention = Branded crisps commercial with celebrity endorser (Walker's ad)

Comparison = Non-food commercial (control)

Excluded conditions = TV endorser in non-food context (Match of the Day) and savoury food commercial (not included)

Outcome = mean ad libitum consumption (kcal) of endorsed and non-endorsed snack, both were crisps (Walkers ready salted), but were labelled and verbally informed "Walker's" and "supermarket brand", time ns.

Conversions = Converted from g to kcal g using published Walkers nutritional info. <https://www.walkers.co.uk/crisps-range/walkers-crisps/ready-salted>

---

**Coates 2019**

Intervention = Influencer food marketing with disclosure + influencer food marketing with no disclosure

Comparison = Influencer non-food marketing with no disclosure (control)

Outcome = mean ad libitum intake (kcal) of endorsed and non-endorsed snack, both were chocolate biscuits (McVitie's digestives), but were labelled and verbally informed "McVitie's" and "Tesco's", 5 minutes.

---

**Coates 2019**

Intervention = Influencer unhealthy food marketing (chocolate cookies)

Comparison = Influencer non-food marketing (control)

Excluded condition = Influencer healthy food marketing (banana)

Intake = mean ad libitum intake (kcal) of unhealthy snacks (jelly candy and chocolate buttons), 10 minutes.

Excluded outcome = mean ad libitum intake of healthy snacks (carrot batons and seedless white grapes).

---



**Figure S1: Trim and fill analysis**

```
. metatrim_ES_seES, egger
```

Note: default data input format (theta, se\_theta) assumed.

Meta-analysis

|        | Pooled | 95% CI |         | Asymptotic |         | No. of  |
|--------|--------|--------|---------|------------|---------|---------|
| Method | Est    | Lower  | Upper   | z_value    | p_value | studies |
| Fixed  | 45.720 | 25.293 | 66.146  | 4.387      | 0.000   | 3       |
| Random | 56.351 | 8.500  | 104.201 | 2.308      | 0.021   |         |

Test for heterogeneity: Q= 9.762 on 2 degrees of freedom (p= 0.008)  
Moment-based estimate of between studies variance = 1396.957

Trimming estimator: Linear

Meta-analysis type: Fixed-effects model

| iteration | estimate | Tn | # to trim | diff |
|-----------|----------|----|-----------|------|
| 1         | 45.720   | 4  | 1         | 6    |
| 2         | 37.252   | 5  | 2         | 2    |
| 3         | 14.405   | 5  | 2         | 1    |
| 4         | 14.405   | 5  | 2         | 0    |

Filled

Meta-analysis

|        | Pooled | 95% CI  |        | Asymptotic |         | No. of  |
|--------|--------|---------|--------|------------|---------|---------|
| Method | Est    | Lower   | Upper  | z_value    | p_value | studies |
| Fixed  | 14.405 | -2.319  | 31.129 | 1.688      | 0.091   | 5       |
| Random | 14.405 | -38.632 | 67.442 | 0.532      | 0.594   |         |

Test for heterogeneity: Q= 37.581 on 4 degrees of freedom (p= 0.000)  
Moment-based estimate of between studies variance = 3218.284

**Figure S2:** Bias assessment for experimental studies

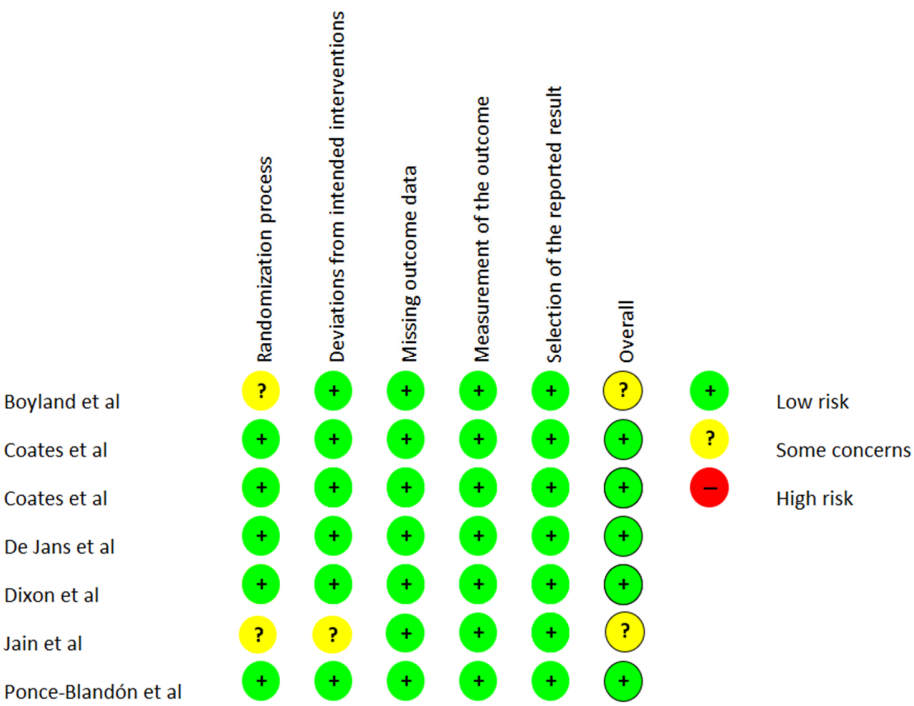

Supplement: s1 [file s1]
